# Supplementary material for: Modelling of physicians’ clinical information-seeking behaviour in Iran: a grounded theory study
Source: HighWire-hosted journal article supplement (doi:10.1136/bmjopen-2023-080602), 2024-04-01
Supplement: bmjopen-2023-080602supp001_data_supplement.pdf [file bmjopen-2023-080602supp001_data_supplement.pdf]

## Supplement 1- Interview guide

| Participant's code: ..... Date of interview: .....                                                                                                                                                                                                        |
|-----------------------------------------------------------------------------------------------------------------------------------------------------------------------------------------------------------------------------------------------------------|
| Start time for interview ..... End time for interview .....                                                                                                                                                                                               |
| <b>Demographic information</b>                                                                                                                                                                                                                            |
| – Age:                                                                                                                                                                                                                                                    |
| – Gender:                                                                                                                                                                                                                                                 |
| – Specialty:                                                                                                                                                                                                                                              |
| – Experience:                                                                                                                                                                                                                                             |
| – Academic medical centers:                                                                                                                                                                                                                               |
| – In which cases do you usually feel you need clinical information? Explain more, please.                                                                                                                                                                 |
| – Consider what you were looking for clinical information, recently. Please remember and explain all the levels step by step.                                                                                                                             |
| – What was your next activity after finding the information you needed?                                                                                                                                                                                   |
| – What are the main sources for your work? what are their characteristics and what are their uses for your clinical decisions? Please mention the databases you are searching for clinical information need? and what are their strengths and weaknesses? |
| – In your opinion, what are the influencing factors and intervening factors on the search for clinical information by physicians?                                                                                                                         |
| – What challenges have you encountered in searching for clinical information? What was your strategy in dealing with these challenges? How do you measure your success?                                                                                   |
| – To what extent and how do you use evidence-based medicine in the treatment of patients? Does this method help your patients' treatment? What challenges have you experienced along this way?                                                            |
| – In your opinion, what are the consequences of clinical information seeking by physicians, reaching appropriate information and using them in the treatment                                                                                              |

**and diagnosis?**
